# Supplementary material for: Effects of self-management education programmes on self-efficacy for osteoarthritis of the knee: a systematic review of randomised controlled trials
Source: Springer Nature journal article supplement (doi:10.1186/s12891-021-04399-y), 2021-06-05
Supplement: MOESM1 [file 19232328]

Additional file 1. Characteristics of the included studies

| Reference                   | Country   | Total participants (drop out) | Inclusion criteria                                                                                                                                                                                                                                                                                                                                                     | Mean symptom duration, years | Mean age, years              | Female, %            | Education (High school or more), %             | Self-efficacy outcomes                                         |
|-----------------------------|-----------|-------------------------------|------------------------------------------------------------------------------------------------------------------------------------------------------------------------------------------------------------------------------------------------------------------------------------------------------------------------------------------------------------------------|------------------------------|------------------------------|----------------------|------------------------------------------------|----------------------------------------------------------------|
| Focht et al., 2017. [39]    | US        | 80 (14)                       | Age 55 + years old, knee pain on most days of the month, Less than 20 min/week of structured exercise during the prior 6 months, Difficulty with basic daily functional tasks due to knee pain, KL 2 or 3 in tibiofemoral OA.                                                                                                                                          | NR                           | 63.5±6.5                     | IG: 90<br>CG: 78     | NR                                             | Self-Regulatory Self-Efficacy, Mobility-Related Self-Efficacy. |
| Foo et al., 2020. [41]      | Malaysia  | 300 (70)                      | Age 35-75 years, KL 2 to 4, knee pain on most days for at least a month and rated more than 40/100 on VAS, bony enlargement of the knee.                                                                                                                                                                                                                               | NR <sup>s</sup>              | NR <sup>s</sup>              | IG: 85.3<br>CG: 80.0 | IG: 35.3 <sup>#</sup><br>CG: 31.3 <sup>#</sup> | Pain Self-Efficacy Questionnaire                               |
| Gay et al., 2020. [42]      | France    | 123 (17)                      | Age 50-75 years, symptomatic knee OA according to the ACR clinical criteria                                                                                                                                                                                                                                                                                            | IG: 12.1±7.7<br>CG: 11.2±7.7 | IG: 66.6±6.4<br>CG: 64.7±7.1 | IG: 83.3<br>CG: 81.2 | NR                                             | ASES for pain, function, and other symptoms                    |
| Helminen et al., 2015. [43] | Finland   | 111 (13)                      | Age 35-75 years old, KL 2 to 4, knee pain on most days for at least a month and rated more than 40/100 on VAS.                                                                                                                                                                                                                                                         | IG: 6.6±4.5<br>CG: 8.9±8.7   | IG: 64.5±7.3<br>CG: 62.8±7.2 | IG: 71<br>CG: 68     | IG: 78<br>CG: 61                               | Pain Self-Efficacy Questionnaire                               |
| Somers et al., 2012. [40]   | US        | 232 (69)                      | Age > 18 years, knee pain on most days of the month, 25≤BMI≤42, meets the ACR criteria and radiographic evidence of OA affecting one or both knees based on the KL, no other major weight-bearing joint affected by OA, OA of the knee(s) was considered the medical condition that contributed most to limitations in daily function, able to read and speak English. | NR                           | 58.0±10.4                    | 79                   | 98                                             | ASES total score, Weight Efficacy Life-Style Questionnaire.    |
| Yip et al., 2007. [37]      | Hong Kong | 182 (62)                      | Meets the ACR clinical criteria*                                                                                                                                                                                                                                                                                                                                       | 8                            | 65                           | 75                   | NR                                             | ASES for pain and other symptoms.                              |

|                           |              |         |                                  |                            |                                      |                  |                      |                                      |
|---------------------------|--------------|---------|----------------------------------|----------------------------|--------------------------------------|------------------|----------------------|--------------------------------------|
| Yip et al.,<br>2008. [38] | Hong<br>Kong | 95 (42) | Meets the ACR clinical criteria* | IG: 8.0±6.0<br>CG: 6.7±6.0 | IG:<br>64.8±10.6<br>CG:<br>63.4±10.7 | IG: 89<br>CG: 82 | IG: 11.1<br>CG: 14.0 | ASES for pain and<br>other symptoms. |
|---------------------------|--------------|---------|----------------------------------|----------------------------|--------------------------------------|------------------|----------------------|--------------------------------------|

ACR; American College of Rheumatology, ASES; Arthritis Self-efficacy Scale, CG; Control group, IG; Intervention group, KL; Kellgren -Lawrence grade, NR; Not recorded, OA; Osteoarthritis, US; United States, VAS; Visual Analog Scale. \*The clinical criteria for knee OA consisted of pain in the knee and any three of the following: (1) aged  $\geq 50$  years; (2) <30 minutes of morning stiffness; (3) crepitus on active motion; (4) bony tenderness; (5) bony enlargement; or (6) no palpable joint warmth. <sup>§</sup>Symptom duration and age were described as frequency in the related article (Mal J Med Health Sci 13(2). 7-15. 2017.). <sup>#</sup>Tertiary education (aged  $\geq 18$  years).
