# Supplementary material for: Effects of self-management education programmes on self-efficacy for osteoarthritis of the knee: a systematic review of randomised controlled trials
Source: Springer Nature journal article supplement (doi:10.1186/s12891-021-04399-y), 2021-06-05
Supplement: MOESM2 [file 19232328]

## Additional file 2. Details of the interventions for each of the studies included

| Reference                      | Intervention                                                                                         | Comparator/<br>Control                    | Subjects,<br>n | Volume                                                                                                                                    | Instructors/<br>facilitators             | Follow-up       |
|--------------------------------|------------------------------------------------------------------------------------------------------|-------------------------------------------|----------------|-------------------------------------------------------------------------------------------------------------------------------------------|------------------------------------------|-----------------|
| Focht et al.,<br>2017. [40]    | 20 min of group-based cognitive behavioural counselling + 60 min of exercise                         | 60 min of exercise                        | NR             | IG: One session/wk to /mo for 36 wks (total 27 sessions, 36 contact hours).<br>CG: Three sessions/wk for 12 wks.                          | NR (study staff)                         | 3 mos<br>12 mos |
| Foo, et al.<br>2020. [41]      | 2.5 hrs of cognitive-behavioural therapy + standard routine care + education booklet                 | Standard routine care + education booklet | 8-12           | IG: one session/2 wks for 6 wks                                                                                                           | PT and nurse                             | 1 mo<br>6 mos   |
| Gay, et al.<br>2020. [43]      | 90 min of self-management exercise education including PA practice + spa therapy + education booklet | Spa therapy + education booklet           | 5-7            | IG: 18 spa therapy sessions during 3 wks + 5 self-management exercise sessions during 16 days<br>CG: 18 spa therapy sessions during 3 wks | IG: PT, PA instructor<br>CG: PT          | 3 mos           |
| Helminen et al.,<br>2015. [44] | 2 hrs of Cognitive-behavioural training for pain management + ordinary GP care                       | Ordinary GP care                          | 7-13           | IG: One session/wk for 6 wks.                                                                                                             | IG: Psychologist, PT<br>CG: GP           | 3 mos<br>12 mos |
| Somers et al.,<br>2012. [42]   | PCST: 1 hr of pain coping skill training program.                                                    | Standard care                             | 6-10           | PCST: one session/wk for the                                                                                                              | PCST: Psychologist<br>BWM: Psychologist, | 6 mos<br>12 mos |

|                        |                                                                                                                           |                                    |       |                                                                                                                                                                           |                       |                        |
|------------------------|---------------------------------------------------------------------------------------------------------------------------|------------------------------------|-------|---------------------------------------------------------------------------------------------------------------------------------------------------------------------------|-----------------------|------------------------|
|                        | or<br>BWM: 1 hr group session of behavioural weight management + 1.5 hrs supervised exercises session<br>or<br>PCST + BWM |                                    |       | first 12 wks and /2wks for the last 12 wks.<br>BWM: one group session and three exercise sessions/wk for the first 12 wks and one group session/2wks for the last 12 wks. | Exercise physiologist |                        |
| Yip et al., 2007. [38] | 2 hrs of modified Arthritis Self-management program including exercise + conventional orthopaedic treatment               | Conventional orthopaedic treatment | 10-15 | IG: One session/wk for 6 wks                                                                                                                                              | Registered nurse      | 1 wk<br>16 wks         |
| Yip et al., 2008. [39] | 2 hrs of modified Arthritis Self-management program including exercise +conventional orthopaedic treatment                | Conventional orthopaedic treatment | 10-15 | IG: One session/wk for 6 wks                                                                                                                                              | Registered nurse      | 1 wk<br>16 wks<br>1 yr |

BWM; Behavioral weight management, CG; Control group, GP; General Practitioner, IG; Intervention group, PCST; Pain coping skill training, PA; Physical activity, PT; Physiotherapist
