# Supplementary material for: Effects of self-management education programmes on self-efficacy for osteoarthritis of the knee: a systematic review of randomised controlled trials
Source: Springer Nature journal article supplement (doi:10.1186/s12891-021-04399-y), 2021-06-05
Supplement: MOESM3 [file 19232328]

Additional file 3. Summary of results in included studies

| Outcome                                          | Intervention |       |       | Control |       |       | SMD (95% CI)        |
|--------------------------------------------------|--------------|-------|-------|---------|-------|-------|---------------------|
|                                                  | Mean         | SD    | Total | Mean    | SD    | Total |                     |
| Self-efficacy for pain at 1 month                |              |       |       |         |       |       |                     |
| ASES for pain [37]                               | 34.89        | 6.27  | 88    | 32.75   | 7.80  | 94    | 0.30 (0.01, 0.59)   |
| ASES for pain [38]                               | 35.16        | 6.17  | 40    | 34.09   | 7.01  | 37    | 0.16 (-0.29, 0.61)  |
| PSEQ [41]                                        | 3.38         | 1.16  | 126   | 3.18    | 1.08  | 128   | 0.18 (-0.17, 0.42)  |
| Self-efficacy for pain within 6 months           |              |       |       |         |       |       |                     |
| ASES for pain, 4 months [37]                     | 36.09        | 13.09 | 88    | 33.27   | 7.98  | 94    | 0.26 (-0.03, 0.55)  |
| ASES for pain, 4 months [38]                     | 36.83        | 6.23  | 40    | 35.17   | 7.71  | 37    | 0.24 (-0.21, 0.68)  |
| PSEQ, 6 months [41]                              | 3.71         | 1.24  | 119   | 3.35    | 1.43  | 111   | 0.27 (0.01, 0.53)   |
| ASES for pain, 3 months [42]                     | 6.50         | 1.70  | 52    | 6.00    | 1.80  | 54    | 0.28 (-0.10, 0.67)  |
| Self-efficacy for pain at 12 months              |              |       |       |         |       |       |                     |
| ASES for pain [38]                               | 38.30        | 7.02  | 40    | 35.48   | 7.46  | 37    | 0.39 (-0.07, 0.84)  |
| PSEQ* <sup>1</sup> [43]                          | 43.10        | 11.10 | 55    | 46.20   | 10.82 | 56    | -0.28 (-0.65, 0.09) |
| Self-efficacy for other symptoms at 1 month      |              |       |       |         |       |       |                     |
| ASES for other symptoms [37]                     | 43.61        | 6.63  | 88    | 40.09   | 8.57  | 94    | 0.46 (0.16, 0.75)   |
| ASES for other symptoms [38]                     | 43.56        | 6.59  | 40    | 39.86   | 8.18  | 37    | 0.50 (0.04, 0.95)   |
| Self-efficacy for other symptoms within 6 months |              |       |       |         |       |       |                     |
| ASES for other symptoms, 4 months [37]           | 42.92        | 8.44  | 88    | 40.12   | 9.09  | 94    | 0.32 (0.02, 0.61)   |
| ASES for other symptoms, 4 months [38]           | 45.21        | 7.56  | 40    | 41.68   | 8.56  | 37    | 0.43 (-0.02, 0.89)  |
| ASES for other symptoms, 3 months [42]           | 7.20         | 1.80  | 52    | 6.90    | 1.90  | 54    | 0.16 (-0.22, 0.54)  |
| Self-efficacy for other symptoms at 12 months    |              |       |       |         |       |       |                     |
| ASES for other symptoms, 12 months [38]          | 46.75        | 8.15  | 40    | 41.03   | 8.90  | 37    | 0.66 (0.20, 1.12)   |
| Self-efficacy for function                       |              |       |       |         |       |       |                     |
| ASES for function, 3 months [42]                 | 7.70         | 1.90  | 52    | 7.60    | 1.70  | 54    | 0.06 (-0.33, 0.44)  |
| Self-efficacy for mobility                       |              |       |       |         |       |       |                     |
| MRSE, 3 months [39]                              | 81.42        | 26.28 | 40    | 74.17   | 27.05 | 40    | 0.27 (-0.17, 0.71)  |

|                                     |                                                              |        |       |    |        |       |    |                    |
|-------------------------------------|--------------------------------------------------------------|--------|-------|----|--------|-------|----|--------------------|
|                                     | MRSE, 12 months [39]                                         | 81.54  | 27.10 | 40 | 71.63  | 28.25 | 40 | 0.35 (-0.09, 0.80) |
| Self-efficacy for self-regulatory   |                                                              |        |       |    |        |       |    |                    |
|                                     | SRSE, 3 months [39]                                          | 63.50  | 18.77 | 40 | 52.50  | 19.98 | 40 | 0.56 (0.11, 1.01)  |
|                                     | SRSE, 12 months [39]                                         | 62.25  | 16.09 | 40 | 46.94  | 22.50 | 40 | 0.78 (0.32, 1.23)  |
| Self-efficacy for weight management |                                                              |        |       |    |        |       |    |                    |
|                                     | WELSQ <sup>*2</sup> , 12 months, vs PCST+BWM [40]            | 6.50   | 3.20  | 62 | 5.70   | 1.10  | 51 | 0.33 (-0.05, 0.70) |
|                                     | WELSQ <sup>*2</sup> , 12 months, vs BWM [40]                 | 5.90   | 1.15  | 59 | 5.70   | 1.10  | 51 | 0.18 (-0.20, 0.55) |
|                                     | WELSQ <sup>*2</sup> , 12 months, vs PCST [40]                | 6.00   | 1.16  | 60 | 5.70   | 1.10  | 51 | 0.27 (-0.11, 0.64) |
| Self-efficacy for knee OA           |                                                              |        |       |    |        |       |    |                    |
|                                     | ASES total score <sup>*2</sup> , 12 months, vs PCST+BWM [40] | 243.25 | 27.37 | 62 | 213.00 | 29.51 | 51 | 1.06 (0.66, 1.46)  |
|                                     | ASES total score <sup>*2</sup> , 12 months, vs BWM [40]      | 222.30 | 29.16 | 59 | 213.00 | 29.51 | 51 | 0.31 (-0.06, 0.69) |
|                                     | ASES total score <sup>*2</sup> , 12 months, vs PCST [40]     | 225.70 | 30.97 | 60 | 213.00 | 29.51 | 51 | 0.42 (0.04, 0.79)  |

\*1The scores calculated as mixed data from 3 and 12 months.

\*2The scores calculated as mixed data from post-treatment, 6 months, and 12 months.

ASES; Arthritis Self-Efficacy Scale, BWM; Body weight management, CI; Confidence interval, MRSE; Mobility-Related Self-Efficacy, PCST; Pain Coping Skill Training, PSEQ; Pain Self-Efficacy Questionnaire, SD; Standard deviation, SMD; Standardised mean difference, SRSE; Self-Regulatory Self-Efficacy, WELSQ; Weight Efficacy Life-Style Questionnaire,
